# Supplementary material for: Increasing Temperature Facilitates Polyp Spreading and Medusa Appearance of the Invasive Hydrozoan Craspedacusta sowerbii
Source: MDPI journal article supplement (doi:10.3390/biology11081100), 2022-07-23
Supplement: s1 [file s1]

# Increasing Temperature Facilitates Polyp Spreading and Medusa Appearance of the Invasive Hydrozoan *Craspedacusta sowerbii*

Guillaume Marchessaux, Florian Luskow, Mickaël Bejean and Evgeny A. Pakhomov

**Table S1.** Parameters used for the Thermal Performance Curve (TPC) model selection. Sigma: residual standard deviation; AIC: Akaike's Information Criterion; AICc: corrected AIC for small sample sizes; df.residual: residual degrees-of-freedom.

| model_name       | sigma       | AIC           | AICc          | df.residual |
|------------------|-------------|---------------|---------------|-------------|
| <b>Boatman</b>   | <b>2.84</b> | <b>150.11</b> | <b>155.45</b> | <b>23</b>   |
| Sharpeschoolfull | 2.91        | 150.85        | 154.67        | 24          |
| Beta             | 2.97        | 151.99        | 155.80        | 24          |
| Thomas2          | 2.98        | 152.23        | 156.04        | 24          |
| Ratkowsky        | 3.22        | 155.77        | 158.38        | 25          |
| Thomas1          | 3.78        | 165.10        | 167.71        | 25          |
| Oneill           | 4.38        | 173.63        | 176.24        | 25          |
| Weibull          | 5.31        | 184.79        | 187.40        | 25          |
| Rezende          | 6.20        | 193.82        | 196.43        | 25          |
| Pawar            | 6.31        | 194.82        | 197.43        | 25          |
| Sharpeschoolhigh | 6.31        | 194.82        | 197.43        | 25          |
| Spain            | 6.96        | 200.54        | 203.15        | 25          |
| Briere2          | 9.26        | 217.08        | 219.69        | 25          |
| Gaussian         | 9.50        | 217.72        | 219.39        | 26          |
| Modifiedgaussian | 9.53        | 218.76        | 221.37        | 25          |
| Flinn            | 10.83       | 225.31        | 226.97        | 26          |
| Hinshelwood      | 12.55       | 234.70        | 237.31        | 25          |
| Quadratic        | 16.73       | 250.52        | 252.19        | 26          |
| Sharpeschoollow  | 18.65       | 257.68        | 260.29        | 25          |
| Johnson_lewin    | 21.39       | 265.66        | 268.27        | 25          |
| Joehnk           | 21.35       | 266.36        | 270.18        | 24          |
| Lactin2          | 23.90       | 272.07        | 274.68        | 25          |
| Kamykowski       | 37.88       | 299.61        | 303.43        | 24          |

**Table S2.** Number of frustule and medusa buds per polyp of *Craspedacusta sowerbii* at 19 and 29°C over time (means  $\pm$  SD).

| Time (days)                       | Number of frustules per polyp     |                                   | Number of medusae buds per polyp    |                                     |
|-----------------------------------|-----------------------------------|-----------------------------------|-------------------------------------|-------------------------------------|
|                                   | 19°C                              | 29°C                              | 19°C                                | 29°C                                |
| 0                                 | 0.00 $\pm$ 0.00                   | 0.00 $\pm$ 0.00                   | 0.000 $\pm$ 0.000                   | 0.000 $\pm$ 0.000                   |
| 2                                 | 0.00 $\pm$ 0.00                   | 0.00 $\pm$ 0.00                   | 0.000 $\pm$ 0.000                   | 0.000 $\pm$ 0.000                   |
| 3                                 | 0.00 $\pm$ 0.00                   | 0.00 $\pm$ 0.00                   | 0.000 $\pm$ 0.000                   | 0.000 $\pm$ 0.000                   |
| 5                                 | 0.00 $\pm$ 0.00                   | 0.00 $\pm$ 0.00                   | 0.000 $\pm$ 0.000                   | 0.000 $\pm$ 0.000                   |
| 7                                 | 0.00 $\pm$ 0.00                   | 0.00 $\pm$ 0.00                   | 0.000 $\pm$ 0.000                   | 0.000 $\pm$ 0.000                   |
| 9                                 | 0.00 $\pm$ 0.00                   | 0.00 $\pm$ 0.00                   | 0.000 $\pm$ 0.000                   | 0.000 $\pm$ 0.000                   |
| 12                                | 0.00 $\pm$ 0.00                   | 0.07 $\pm$ 0.12                   | 0.000 $\pm$ 0.000                   | 0.000 $\pm$ 0.000                   |
| 14                                | 0.00 $\pm$ 0.00                   | 0.00 $\pm$ 0.00                   | 0.000 $\pm$ 0.000                   | 0.000 $\pm$ 0.000                   |
| 16                                | 0.10 $\pm$ 0.17                   | 0.00 $\pm$ 0.00                   | 0.000 $\pm$ 0.000                   | 0.000 $\pm$ 0.000                   |
| 19                                | 0.00 $\pm$ 0.00                   | 0.19 $\pm$ 0.05                   | 0.000 $\pm$ 0.000                   | 0.000 $\pm$ 0.000                   |
| 21                                | 0.11 $\pm$ 0.19                   | 0.20 $\pm$ 0.03                   | 0.000 $\pm$ 0.000                   | 0.000 $\pm$ 0.000                   |
| 23                                | 0.13 $\pm$ 0.15                   | 0.20 $\pm$ 0.03                   | 0.000 $\pm$ 0.000                   | 0.000 $\pm$ 0.000                   |
| 25                                | 0.23 $\pm$ 0.14                   | 0.16 $\pm$ 0.08                   | 0.000 $\pm$ 0.000                   | 0.000 $\pm$ 0.000                   |
| 27                                | 0.21 $\pm$ 0.12                   | 0.16 $\pm$ 0.07                   | 0.000 $\pm$ 0.000                   | 0.000 $\pm$ 0.000                   |
| 29                                | 0.16 $\pm$ 0.09                   | 0.15 $\pm$ 0.08                   | 0.000 $\pm$ 0.000                   | 0.000 $\pm$ 0.000                   |
| 31                                | 0.25 $\pm$ 0.11                   | 0.15 $\pm$ 0.01                   | 0.000 $\pm$ 0.000                   | 0.000 $\pm$ 0.000                   |
| 33                                | 0.17 $\pm$ 0.04                   | 0.11 $\pm$ 0.05                   | 0.000 $\pm$ 0.000                   | 0.000 $\pm$ 0.000                   |
| 35                                | 0.18 $\pm$ 0.11                   | 0.14 $\pm$ 0.08                   | 0.000 $\pm$ 0.000                   | 0.000 $\pm$ 0.000                   |
| 37                                | 0.21 $\pm$ 0.10                   | 0.08 $\pm$ 0.04                   | 0.000 $\pm$ 0.000                   | 0.000 $\pm$ 0.000                   |
| 39                                | 0.27 $\pm$ 0.18                   | 0.01 $\pm$ 0.01                   | 0.000 $\pm$ 0.000                   | 0.000 $\pm$ 0.000                   |
| 42                                | 0.21 $\pm$ 0.16                   | 0.02 $\pm$ 0.03                   | 0.000 $\pm$ 0.000                   | 0.000 $\pm$ 0.000                   |
| 44                                | 0.29 $\pm$ 0.03                   | 0.02 $\pm$ 0.01                   | 0.000 $\pm$ 0.000                   | 0.000 $\pm$ 0.000                   |
| 46                                | 0.16 $\pm$ 0.06                   | 0.02 $\pm$ 0.02                   | 0.000 $\pm$ 0.000                   | 0.000 $\pm$ 0.000                   |
| 48                                | 0.42 $\pm$ 0.13                   | 0.01 $\pm$ 0.02                   | 0.000 $\pm$ 0.000                   | 0.006 $\pm$ 0.010                   |
| 50                                | 0.51 $\pm$ 0.18                   | 0.02 $\pm$ 0.01                   | 0.000 $\pm$ 0.000                   | 0.023 $\pm$ 0.020                   |
| 52                                | 0.49 $\pm$ 0.09                   | 0.04 $\pm$ 0.02                   | 0.000 $\pm$ 0.000                   | 0.051 $\pm$ 0.041                   |
| 54                                | 0.47 $\pm$ 0.03                   | 0.01 $\pm$ 0.01                   | 0.000 $\pm$ 0.000                   | 0.041 $\pm$ 0.031                   |
| 56                                | 0.40 $\pm$ 0.11                   | 0.02 $\pm$ 0.02                   | 0.000 $\pm$ 0.000                   | 0.037 $\pm$ 0.014                   |
| 58                                | 0.41 $\pm$ 0.07                   | 0.03 $\pm$ 0.02                   | 0.000 $\pm$ 0.000                   | 0.005 $\pm$ 0.009                   |
| 60                                | 0.23 $\pm$ 0.13                   | 0.00 $\pm$ 0.01                   | 0.000 $\pm$ 0.000                   | 0.019 $\pm$ 0.007                   |
| 62                                | 0.19 $\pm$ 0.04                   | 0.00 $\pm$ 0.00                   | 0.000 $\pm$ 0.000                   | 0.000 $\pm$ 0.000                   |
| 64                                | 0.25 $\pm$ 0.09                   | 0.01 $\pm$ 0.01                   | 0.000 $\pm$ 0.000                   | 0.028 $\pm$ 0.025                   |
| 66                                | 0.16 $\pm$ 0.04                   | 0.06 $\pm$ 0.05                   | 0.000 $\pm$ 0.000                   | 0.042 $\pm$ 0.018                   |
| 68                                | 0.15 $\pm$ 0.02                   | 0.01 $\pm$ 0.02                   | 0.000 $\pm$ 0.000                   | 0.051 $\pm$ 0.025                   |
| 70                                | 0.16 $\pm$ 0.10                   | 0.02 $\pm$ 0.02                   | 0.000 $\pm$ 0.000                   | 0.028 $\pm$ 0.009                   |
| 72                                | 0.18 $\pm$ 0.06                   | 0.02 $\pm$ 0.02                   | 0.000 $\pm$ 0.000                   | 0.059 $\pm$ 0.052                   |
| 74                                | 0.14 $\pm$ 0.01                   | 0.03 $\pm$ 0.06                   | 0.000 $\pm$ 0.000                   | 0.014 $\pm$ 0.024                   |
| 76                                | 0.18 $\pm$ 0.06                   | 0.01 $\pm$ 0.02                   | 0.000 $\pm$ 0.000                   | 0.023 $\pm$ 0.040                   |
| 78                                | 0.15 $\pm$ 0.06                   | 0.02 $\pm$ 0.03                   | 0.000 $\pm$ 0.000                   | 0.019 $\pm$ 0.032                   |
| 80                                | 0.09 $\pm$ 0.04                   | 0.28 $\pm$ 0.02                   | 0.000 $\pm$ 0.000                   | 0.030 $\pm$ 0.026                   |
| <b>Mean (<math>\pm</math> SD)</b> | <b>0.18 <math>\pm</math> 0.14</b> | <b>0.06 <math>\pm</math> 0.07</b> | <b>0.000 <math>\pm</math> 0.000</b> | <b>0.012 <math>\pm</math> 0.018</b> |

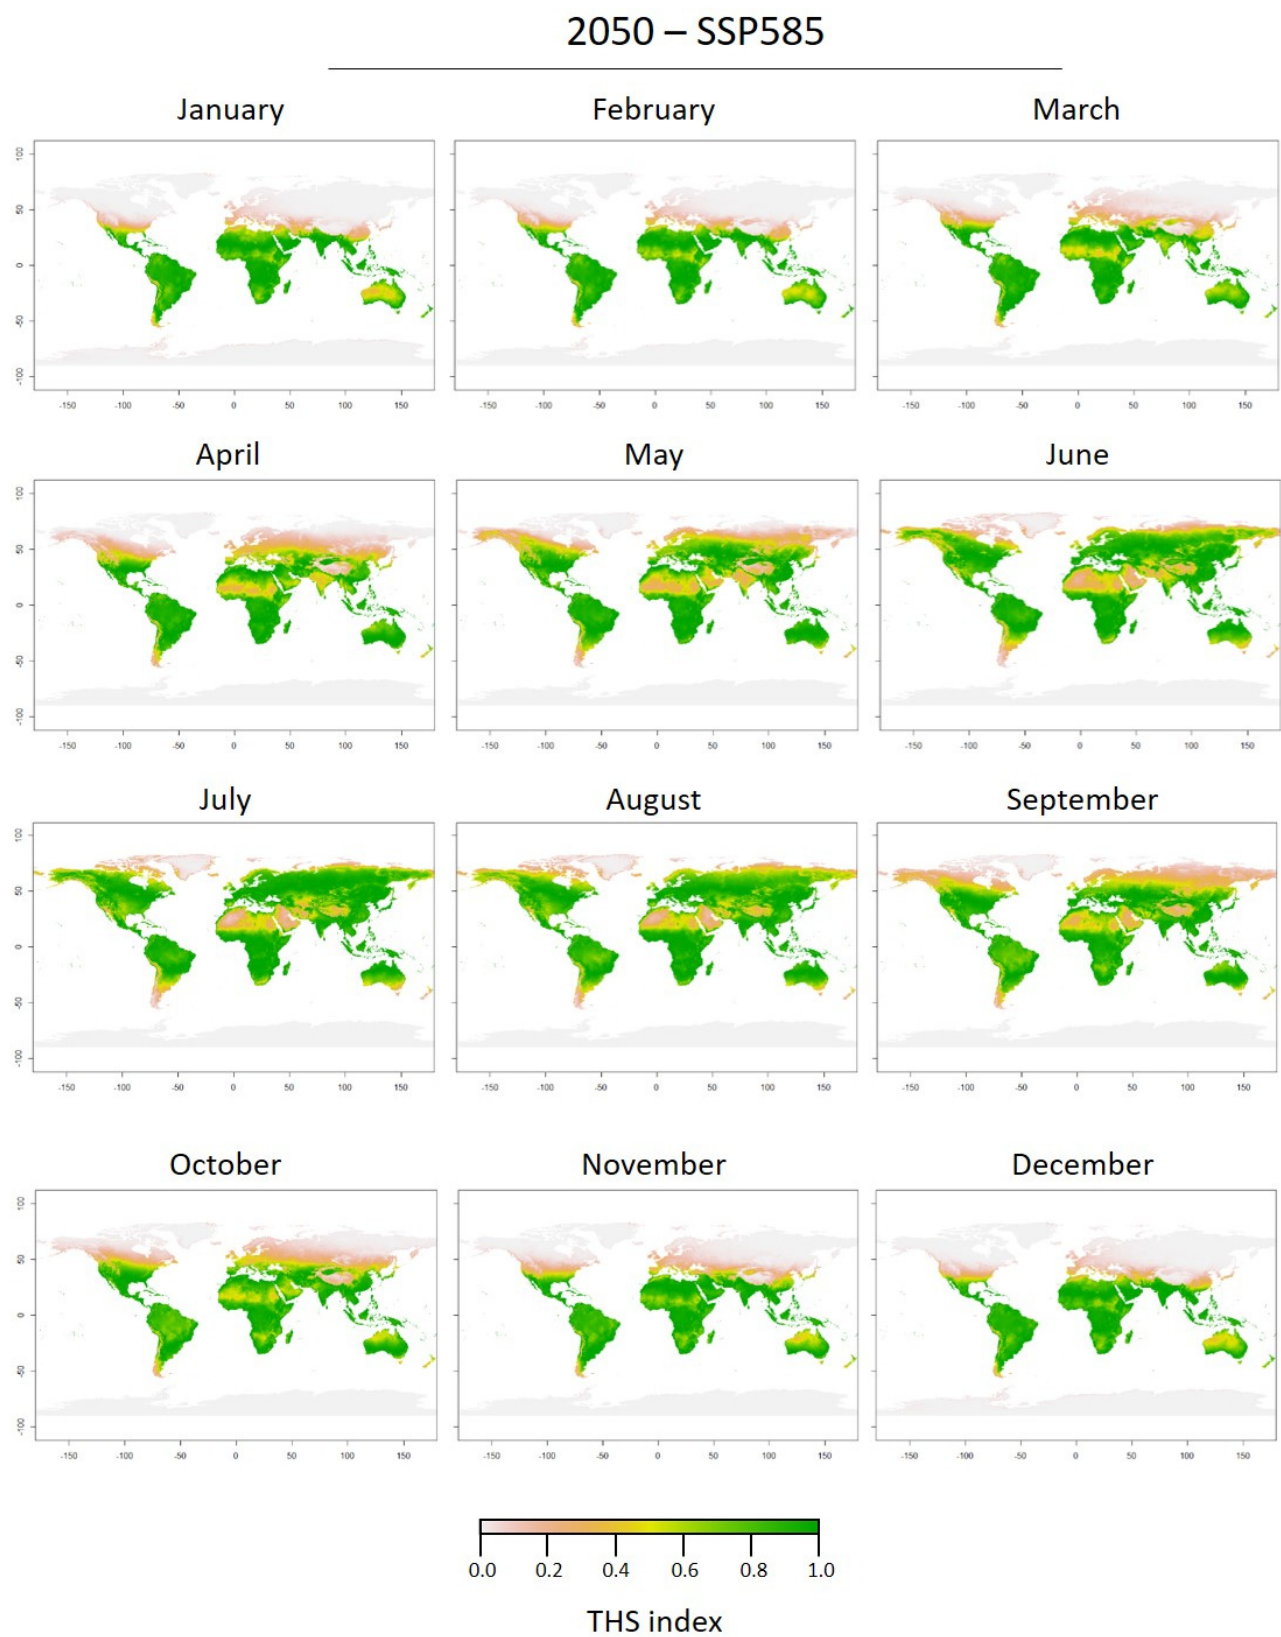

**Figure S1.** 2050-SSP585 monthly predictions of thermal habitat suitability of the medusa stage of *Craspedacusta sowerbii* based on the Thermal Performance Curve (TPC) performed on the activity rate (pulsations  $\text{min}^{-1}$ , lower panel).

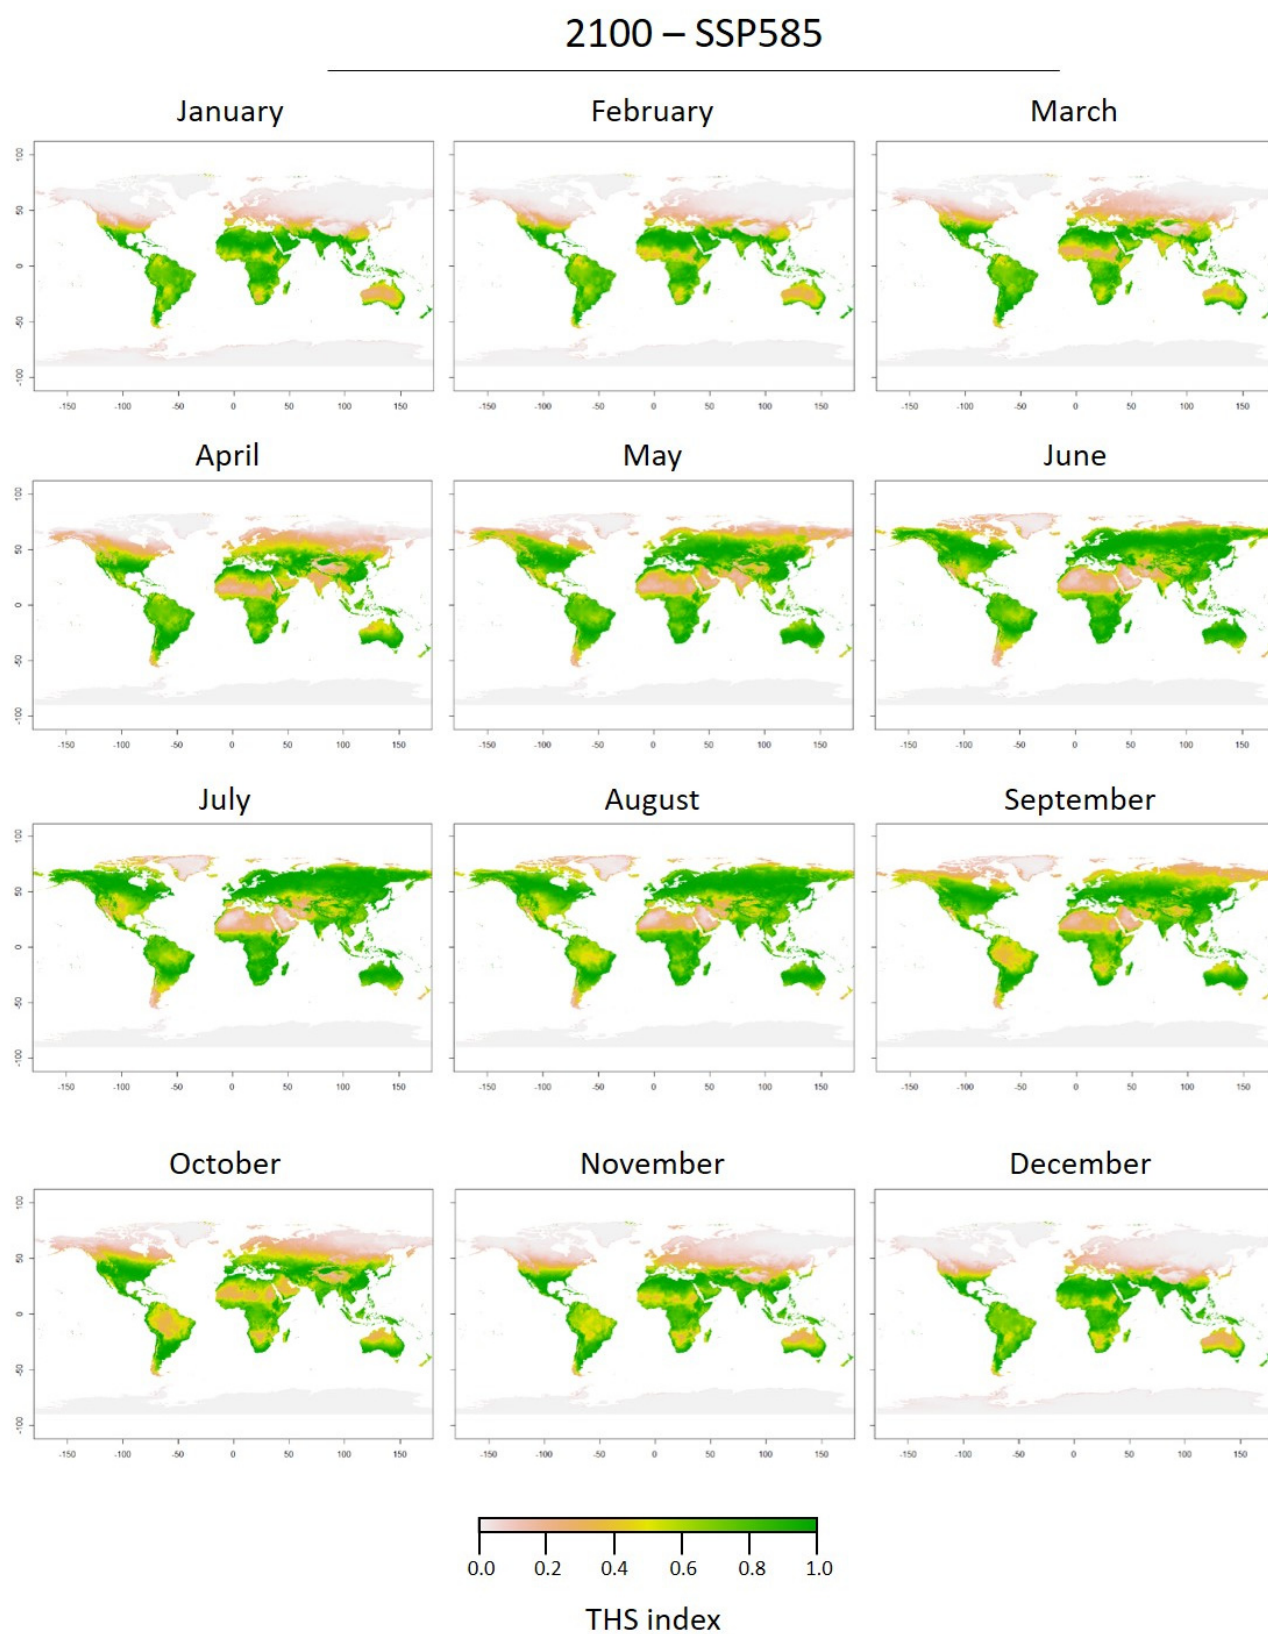

**Figure S2.** 2100-SSP585 monthly predictions of thermal habitat suitability of the medusa stage of *Craspedacusta sowerbii* based on the Thermal Performance Curve (TPC) performed on the activity rate (pulsations  $\text{min}^{-1}$ , lower panel).
